# Supplementary material for: Methods used by pre-service Nigeria Certificate in Education teachers in solving quantitative problems in chemistry
Source: Royal Society of Chemistry journal article supplement (doi:10.1039/c0rp90012e), 2011-01-01
Supplement: c0rp90012e.pdf [file c0rp90012e.pdf]

## Supplementary Data

### Appendix A

**Solutions: showing the methods used by a 200 level male NCE chemistry major (M2M) with Serial Number 107 to solve the CPST items including retrospective interview questions and responses**  
CPST item1:

**I: Explain to me all the steps in your answer to this question**

S107: I used the formula,  $\frac{P_1 V_1}{T_1} = \frac{P_2 V_2}{T_2}$ , I sorted out data to find  $V_1$  as

$3.8\text{cm}^3$ ,  $P_1 = 5 \text{ atm}$ ,  $V_2 = 1/3 \times 3.8\text{cm}^3 = 1.26\text{cm}^3$ . It follows that

$$\frac{5\text{atm} \times 3.8\text{cm}^3}{273\text{k}} = \frac{P_2 \times 1.26\text{cm}^3}{819\text{k}}, \quad P_2 = 45\text{atm. (used Plug\&ChugMethod)}$$

**I: What made you to decide to solve the question the way you did?**

S107: *Because the question involves Gas Laws*

**I: Could you solve the question in another way?**

S107: *There could be other ways, but I cannot remember*

CPST item2:

**I: Explain to me all the steps in your answer to this question**

S107: I sorted the values i.e. mass of copper anode ( $M_1$ ) and mass of copper cathode ( $M_2$ ), all before experiment. Mass of copper anode ( $Mr_1$ ) and mass of copper cathode ( $Mr_2$ ) all after the experiment. I used the equation.

$$\frac{M_1}{M_2} = \frac{Mr_1}{Mr_2}, \quad Mr_2 = \frac{M_1 M_2}{M_1}, \quad \text{I substitute the values and got } M_2 = 11.63\text{g. (used Ratio and Proportion Method)}$$

**I: What made you to decide to solve the question the way you did?**

S107: *Because the question involves calculating mass from the given equation.*

**I: Could you solve the question in another way?**

S107: *There could be other ways but I cannot remember.*

CPST item3:

**I: Explain to me all the steps in your answer to this question**

S107: Using the stoichiometric equation, the mole ratio of  $\text{N}_2$  to  $\text{H}_2$  is 1:3 and Mass = Relative Molar mass x Concentration. Therefore, Mass =  $31 \times 1.5\text{g} = 46.5\text{g}$ . *(used Reaction Chemical Equivalence Method)*

**I: What made you to decide to solve the question the way you did?**

S107: *Because the question involves mole ratios*

**I: Could you solve the question in another way?**

S107: *There may be other ways, but I cannot remember.*

CPST item4:

**I: Explain to me all the steps in your answer to this question**

S107: I used the formula,  $\frac{\text{impure}}{\text{pure}} \times \frac{100}{1}$ , substituting the given data will give 125%. *(used Ratio and Proportion)*

**I: What made you to decide to solve the question the way you did?**

S107: *The question involves calculating percentage composition.*

**I: Could you solve the question in another way?**

S107: *No.*

## Appendix B

**Solutions: showing the methods used by a 300 level NCE chemistry major with Serial Number 192 to solve the CPST items including retrospective interview questions and responses**

CPST item1:

**I: Explain to me all the steps in your answer to this question**

S192: Using the general gas equation, i.e.  $P_1T_1 = P_2T_2$ ,

$$P_2 = \frac{P_1T_1}{T_2}, \text{ substituting the values given into this formula, } P_2 =$$

1.67atm. (*used Plug and Chug Method*)

**I: What made you to solve the question the way you did?**

S192: Because the question involves gas laws.

**I: Could you solve the question in another way?**

S192: No, this is the only way I can solve it.

CPST item2:

**I: Explain to me all the steps in your answer to this question**

S192: I sorted the data given. I used the formula  $M_2 = \frac{M_1 \times M_{ii}}{M_i}$ , and got a final

answer of 11.88g. (*used Ratio and Proportion Method*)

**I: What made you to solve the question the way you did?**

S192: I just feel that, that is the way to do it.

**I: Could you solve the question in another way?**

S192M: No, I don't think so.

CPST item3:

**I: Explain to me all the steps in your answer to this question**

S192: I first of all calculated the relative molecular mass of ammonia as 34g, then I got stuck and could not proceed from there (*started but stucked*)

**I: What made you to solve the question the way you did?**

S192: I did solve the question completely, I could not continue from I stopped.

**I: Could you solve the question in another way?**

S192: No.

CPST item4:

**I: Explain to me all the steps in your answer to this question**

S192: I sorted out given data. Using the percentage purity formula, i.e.  $\frac{\text{impure}}{\text{pure}} \times \frac{100}{1}$ ,

I substituted and got the answer as 79.9%. (*used Ratio and Proportion Method*)

**I: What made you to solve the question the way you did?**

S192: It involves calculating percentage purity.

**I: Could you solve the question in another way?**

S192: No.

## Appendix C

**Solutions: showing the methods used by a 200 level NCE non- major with Serial Number 16 to solve the CPST items including retrospective interview questions and responses**

### CPST item1:

**I: Explain to me all the steps in your answer to this question**

S16: I arranged the given data,  $P_1 = 5.00\text{atm}$ ,  $T_1 = 0^\circ\text{C}$ ,  $T_2 = 546^\circ\text{C}$ . I used  $P_1T_1 = P_2T_2$ ,  $P_2 = P_1T_1 \times T_2$ ,  $P_2 = 5.00 \times 0^\circ\text{C} \times 546^\circ\text{C}$ . (*used Plug and Chug Method*)

**I: What made you to solve the question the way you did?**

S16: Because it involves gas laws, isn't it?

**I: Could you solve the question in another way?**

S16: No.

### CPST item2:

**I: Explain to me all the steps in your answer to this question**

S16: The given data were, mass anode before experiment was = 9.20g, that cathode was = 7.75g. After experiment anode was = 6.09g. Then cathode =  $\frac{6.00\text{g} \times 7.75\text{g}}{9.20\text{g}}$ .

(*used Ratio and Proportion Method*)

**I: What made you to decide to solve the question the way you did?**

S16: It involves electrolysis.

**I: Could you solve the question in another way?**

S16: No.

### CPST Item 3:

**I: Explain to me all the steps in your answer to this question**

S16: I wrote the given equation that  $\text{N}_2 + 3\text{H}_2 \longrightarrow 2\text{NH}_3$  from the equation 1 mole of hydrogen would produce 2 moles of ammonia. (*started using Reaction Chemical Equivalence Method but could not complete the solution*)

**I: What made you to decide to solve the question the way you did?**

S16: I just guess the answer.

**I: Could you solve the question in another way?**

S16: No.

### CPST Item 4:

**I: Explain to me all the steps in your answer to this question**

S16: Mass of pure oxide was 3.978g = 100% purity.

Mass of black oxide was 3.178g = ?

$$\% \text{ composition of black oxide} = \frac{3.178\text{g}}{3.978\text{g}} \times \frac{100}{1} = 79.88\text{g} .$$

(*used Ratio and Proportion Method*)

**I: What made you to decide to solve the question the way you did?**

S16: The question involves calculating percentage composition of substances.

**I: Could you solve the question in another way?**

S16: No.

## Appendix D

**Solutions: showing the methods used by a 300 level NCE non- major with Serial Number 59 to solve the CPST items including retrospective interview questions and responses**

### CPST Item1:

**I: Explain to me all the steps in your answer to this question**

S59: I arranged the given data,  $P_1 = 5.00\text{atm}$ ,

$$T_1 = 0^\circ\text{C} + 273\text{k} = 273\text{k}$$

$$T_2 = 546^\circ\text{C} + 273\text{k} = 819\text{k}$$

$$P_2 = ?$$

$$\text{I used } \frac{P_1}{T_1} = \frac{P_2}{T_2}, P_2 = \frac{P_1 \times T_2}{T_1}$$

$$P_2 = \frac{5.00\text{atm} \times 819\text{k}}{273\text{k}} = 15\text{atm}.$$

$$P_2 = 15\text{atm. (used Plug and Chug Method)}$$

**I: What made you to solve the question the way you did?**

S59: Because it involves the ideal gas equation.

**I: Could you solve the question in another way?**

S59: No.

### CPST Item2:

**I: Explain to me all the steps in your answer to this question**

S59: I sorted out the given data, i.e. mass of anode before experiment = 9.20g, and that of cathode = 7.75g. Now the experiment mass of anode 6.00g, that of cathode = ?

$$\text{Therefore, mass of cathode after the experiment} = \frac{6.00\text{g} \times 7.75\text{g}}{9.20\text{g}} = 5.05\text{g}.$$

*used Ratio and Proportion Method)*

**I: What made you to solve the question the way you did?**

S59: Because it was an electrolysis question.

**I: Could you solve the question in another way?**

S59: No.

### CPST Item 3:

**I: Explain to me all the steps in your answer to this question**

S59: I used the formula

$$\text{Mass} = \frac{\text{Concentration of } \text{NH}^3}{\text{Molar mass of } \text{NH}^3}$$

$$\text{Mole of hydrogen} = 1.0$$

$$\text{Concentration in gram of } \text{NH}_3 = ?$$

$$\begin{aligned} \text{Molar mass of } \text{NH}_3 &= 14 + (1 \times 3) \\ &= 17 \end{aligned}$$

$$\text{Concentration in gram/of } \text{NH}_3 = 17\text{g. (used Plug and Chug Method)}$$

**I: What made you to solve the question the way you did?**

S59: The question involved calculating moles.

**I: Could you solve the question in another way?**

S59: No.

### CPST Item 4:

**I: Explain to me all the steps in your answer to this question**

S59: I arranged the given data

$$\text{Mass of Pure Cu} = 3.178\text{g} = 100\% \text{ purity}$$

Mass of black oxide = 3.978g = ?

$$\% \text{ composition of black oxide} = \frac{\text{Mass of Pure Cu}}{\text{Mass of black oxide}} \times \frac{100}{1}$$

$\therefore$  % composition of black oxide = 79.88g.

*( used Ratio and Proportion Method)*

N3F: Because I used the correct formula.

**I: What made you to solve the question the way you did?**

S59: Because it involves calculating percentage composition.

**I: Could you solve the question in another way?**

S59: No.
